# Supplementary material for: Assessment of Integrated Aerosol Sampling Techniques in Indoor, Confined and Outdoor Environments Characterized by Specific Emission Sources
Source: MDPI journal article supplement (doi:10.3390/app11104360), 2021-05-11
Supplement: s1 [file s1]

# Assessment of integrated aerosol sampling techniques in indoor, confined and outdoor environments characterized by specific emission sources

Laura Borgese<sup>\*1</sup>, Maria Chiesa<sup>\*2</sup>, Ahmad Assi<sup>1</sup>, Claudio Marchesi<sup>1</sup>, Anne Wambui Mutahi<sup>1</sup>, Franko Kasemi<sup>1</sup>, Stefania Federici<sup>1</sup>, Angelo Finco<sup>2</sup>, Giacomo Gerosa<sup>2</sup>, Dario Zappa<sup>3</sup>, Elisabetta Comini<sup>3</sup>, Claudio Carnevale<sup>1</sup>, Marialuisa Volta<sup>1</sup>, Donatella Placidi<sup>4</sup>, Roberto Lucchini<sup>4,5</sup>, Elza Bontempi<sup>1</sup> and Laura E. Depero<sup>1</sup>

<sup>1</sup> INSTM and Department of Mechanical and Industrial Engineering, University of Brescia, via Branze, 38 – 25123, Brescia (Italy); [laura.borgese@unibs.it](mailto:laura.borgese@unibs.it), [a.ssi@unibs.it](mailto:a.ssi@unibs.it), [c.marchesi003@unibs.it](mailto:c.marchesi003@unibs.it), [a.mutahi@unibs.it](mailto:a.mutahi@unibs.it), [f.kasemi@studenti.unibs.it](mailto:f.kasemi@studenti.unibs.it), [stefania.federici@unibs.it](mailto:stefania.federici@unibs.it), [claudio.carnevale@unibs.it](mailto:claudio.carnevale@unibs.it), [marialuisa.volta@unibs.it](mailto:marialuisa.volta@unibs.it), [elza.bontempi@unibs.it](mailto:elza.bontempi@unibs.it), [laura.depero@unibs.it](mailto:laura.depero@unibs.it).

<sup>2</sup> Università Cattolica del Sacro Cuore, Department of Mathematics and Physics, Via Musei 41 - 25121 Brescia, Italy; [maria.chiesa@unicatt.it](mailto:maria.chiesa@unicatt.it), [angelo.finco@unicatt.it](mailto:angelo.finco@unicatt.it), [giacomo.gerosa@unicatt.it](mailto:giacomo.gerosa@unicatt.it)

<sup>3</sup> Sensor Laboratory, Department of Information Engineering (DII), University of Brescia, via Branze, 38 – 25123, Brescia (Italy); [dario.zappa@unibs.it](mailto:dario.zappa@unibs.it), [elisabetta.comini@unibs.it](mailto:elisabetta.comini@unibs.it).

<sup>4</sup> Department of Medical and Surgical Specialties, Radiological Sciences, and Public Health, University of Brescia, Viale Europa, 11 - 25123 Brescia, Italy; [donatella.placidi@unibs.it](mailto:donatella.placidi@unibs.it), [roberto.lucchini@unibs.it](mailto:roberto.lucchini@unibs.it)

<sup>5</sup> Department of Environmental Health, Robert Stempel College of Public Health and Social Work, Florida International University, 11200 SW 8th Street AHC5, Miami, FL 33199

\* Correspondence: [laura.borgese@unibs.it](mailto:laura.borgese@unibs.it); [maria.chiesa@unicatt.it](mailto:maria.chiesa@unicatt.it)

## Supporting Information

### Tables

**Table S1.** Classification of the type of events occurred during the monitoring campaign with specific brief descriptions and labels.

| Symbol | Event description             | Emission source                     |
|--------|-------------------------------|-------------------------------------|
| H      | Hammering                     | Resuspension                        |
| C      | Crane movements               | Resuspension                        |
| D      | Drilling works                | Resuspension                        |
| G      | Grinding works                | Material Resuspension               |
| S      | Presence of nearby smokers    | Cigarette combustion                |
| E      | Van or car passing by         | Internal combustion engine exhausts |
| V      | Local forced ventilation      | Aspiration                          |
| B      | Building & construction works | Material Resuspension               |
| T      | Crane truck circulation       | Internal combustion engine exhausts |

**Table S2.** Results of the least square method applied to the comparison of KORA and AirVisual Pro with the sum of various ELPI + fractions: 8-11, 7-11, 6-11, 1-11. The sum of the squares of deviations for each comparison is reported from columns 3 to 5, minimum values are in bold.

| Monitoring site and environmental condition | Sampling device | 8-11  | 7-11  | 6-11   | 1-11   |
|---------------------------------------------|-----------------|-------|-------|--------|--------|
| Indoor quiet 12/03/2018                     | KORA            | 2394  | 949   | 249    | 919    |
|                                             | AirVisual Pro   | 2658  | 1063  | 148    | 692    |
| Indoor quiet 13/03/2018                     | KORA            | 3088  | 363   | 2539   | 5139   |
|                                             | AirVisual Pro   | 5034  | 523   | 1222   | 3164   |
| Indoor quiet 14/03/2018                     | KORA            | 4375  | 624   | 3494   | 7478   |
|                                             | AirVisual Pro   | 8024  | 1306  | 1204   | 3644   |
| Indoor busy 15/03/2018                      | KORA            | 3778  | 6024  | 14140  | 20132  |
|                                             | AirVisual Pro   | 16241 | 5975  | 2797   | 3021   |
| Indoor busy 16/03/2018                      | KORA            | 5493  | 1562  | 2538   | 8515   |
|                                             | AirVisual Pro   | 7015  | 1905  | 1695   | 6797   |
| Indoor quiet 19/03/2018                     | KORA            | 1834  | 717   | 312    | 641    |
|                                             | AirVisual Pro   | 1685  | 553   | 145    | 482    |
| Indoor busy 20/03/2018                      | KORA            | 8378  | 19488 | 30023  | 13134  |
|                                             | AirVisual Pro   | 5027  | 13481 | 22118  | 9899   |
| Indoor busy 21/03/2018                      | KORA            | 1244  | 4436  | 14556  | 25117  |
|                                             | AirVisual Pro   | 7443  | 1066  | 4228   | 10292  |
| Indoor busy 22/03/2018                      | KORA            | 1170  | 7128  | 19846  | 28550  |
|                                             | AirVisual Pro   | 10682 | 1281  | 3536   | 7174   |
| Indoor quiet 23/03/2018                     | KORA            | 893   | 1964  | 8010   | 11528  |
|                                             | AirVisual Pro   | 5635  | 498   | 1731   | 3412   |
| Outdoor 26/03/2018                          | KORA            | 3697  | 55289 | 112485 | 128956 |
|                                             | AirVisual Pro   | 3917  | 11914 | 137498 | 44518  |
| Garage 27/03/2018                           | KORA            | 3916  | 38151 | 79523  | 96293  |
|                                             | AirVisual Pro   | 35016 | 11757 | 25624  | 33731  |

**Table S3.** Correlation matrices of PN concentrations associated to ELPI + Stages from 1 to 14. High correlation is highlighted for coefficients larger than 0.7, reported in bold.

| Indoor quiet 12/03/2018 |              |              |              |              |              |              |              |              |              |              |              |              |              |              |
|-------------------------|--------------|--------------|--------------|--------------|--------------|--------------|--------------|--------------|--------------|--------------|--------------|--------------|--------------|--------------|
|                         | Stage1       | Stage2       | Stage3       | Stage4       | Stage5       | Stage6       | Stage7       | Stage8       | Stage9       | Stage10      | Stage11      | Stage12      | Stage13      | Stage14      |
| Stage1                  | <b>1.000</b> | <b>0.841</b> | 0.626        | 0.121        | 0.080        | 0.109        | -0.108       | 0.004        | 0.245        | 0.068        | 0.083        | 0.124        | -0.045       | -0.114       |
| Stage2                  | <b>0.841</b> | <b>1.000</b> | <b>0.903</b> | 0.509        | 0.463        | 0.446        | 0.074        | 0.228        | 0.162        | -0.100       | -0.049       | 0.121        | 0.022        | -0.051       |
| Stage3                  | 0.626        | <b>0.903</b> | <b>1.000</b> | <b>0.801</b> | <b>0.762</b> | <b>0.717</b> | 0.277        | 0.441        | 0.059        | -0.234       | -0.142       | 0.098        | 0.083        | -0.006       |
| Stage4                  | 0.121        | 0.509        | <b>0.801</b> | <b>1.000</b> | <b>0.995</b> | <b>0.904</b> | 0.473        | 0.611        | -0.149       | -0.404       | -0.287       | -0.002       | 0.132        | 0.062        |
| Stage5                  | 0.080        | 0.463        | <b>0.762</b> | <b>0.995</b> | <b>1.000</b> | <b>0.923</b> | 0.513        | 0.637        | -0.161       | -0.408       | -0.289       | -0.014       | 0.131        | 0.070        |
| Stage6                  | 0.109        | 0.446        | <b>0.717</b> | <b>0.904</b> | <b>0.923</b> | <b>1.000</b> | <b>0.781</b> | <b>0.839</b> | 0.038        | -0.187       | -0.091       | 0.108        | 0.187        | 0.116        |
| Stage7                  | -0.108       | 0.074        | 0.277        | 0.473        | 0.513        | <b>0.781</b> | <b>1.000</b> | <b>0.905</b> | 0.268        | 0.188        | 0.231        | 0.267        | 0.271        | 0.210        |
| Stage8                  | 0.004        | 0.228        | 0.441        | 0.611        | 0.637        | <b>0.839</b> | <b>0.905</b> | <b>1.000</b> | 0.423        | 0.272        | 0.322        | 0.421        | 0.405        | 0.302        |
| Stage9                  | 0.245        | 0.162        | 0.059        | -0.149       | -0.161       | 0.038        | 0.268        | 0.423        | <b>1.000</b> | <b>0.821</b> | <b>0.781</b> | <b>0.705</b> | 0.471        | 0.357        |
| Stage10                 | 0.068        | -0.100       | -0.234       | -0.404       | -0.408       | -0.187       | 0.188        | 0.272        | <b>0.821</b> | <b>1.000</b> | <b>0.803</b> | 0.667        | 0.437        | 0.358        |
| Stage11                 | 0.083        | -0.049       | -0.142       | -0.287       | -0.289       | -0.091       | 0.231        | 0.322        | <b>0.781</b> | <b>0.803</b> | <b>1.000</b> | 0.654        | 0.508        | 0.415        |
| Stage12                 | 0.124        | 0.121        | 0.098        | -0.002       | -0.014       | 0.108        | 0.267        | 0.421        | <b>0.705</b> | 0.667        | 0.654        | <b>1.000</b> | 0.601        | 0.519        |
| Stage13                 | -0.045       | 0.022        | 0.083        | 0.132        | 0.131        | 0.187        | 0.271        | 0.405        | 0.471        | 0.437        | 0.508        | 0.601        | <b>1.000</b> | 0.616        |
| Stage14                 | -0.114       | -0.051       | -0.006       | 0.062        | 0.070        | 0.116        | 0.210        | 0.302        | 0.357        | 0.358        | 0.415        | 0.519        | 0.616        | <b>1.000</b> |
| Indoor quiet 13/03/2018 |              |              |              |              |              |              |              |              |              |              |              |              |              |              |
|                         | Stage1       | Stage2       | Stage3       | Stage4       | Stage5       | Stage6       | Stage7       | Stage8       | Stage9       | Stage10      | Stage11      | Stage12      | Stage13      | Stage14      |
| Stage1                  | <b>1.000</b> | 0.390        | 0.298        | 0.442        | 0.580        | <b>0.823</b> | <b>0.734</b> | 0.688        | 0.577        | 0.167        | -0.035       | -0.005       | 0.021        | -0.008       |
| Stage2                  | 0.390        | <b>1.000</b> | <b>0.916</b> | <b>0.913</b> | <b>0.844</b> | 0.416        | 0.060        | 0.020        | 0.064        | 0.104        | -0.086       | 0.040        | -0.022       | 0.002        |
| Stage3                  | 0.298        | <b>0.916</b> | <b>1.000</b> | <b>0.948</b> | <b>0.870</b> | 0.394        | 0.021        | -0.021       | 0.034        | 0.100        | -0.073       | 0.035        | -0.037       | -0.001       |
| Stage4                  | 0.442        | <b>0.913</b> | <b>0.948</b> | <b>1.000</b> | <b>0.966</b> | 0.554        | 0.146        | 0.088        | 0.114        | 0.129        | -0.084       | 0.047        | -0.017       | 0.014        |
| Stage5                  | 0.580        | <b>0.844</b> | <b>0.870</b> | <b>0.966</b> | <b>1.000</b> | <b>0.728</b> | 0.335        | 0.261        | 0.251        | 0.169        | -0.064       | 0.052        | -0.003       | 0.022        |
| Stage6                  | <b>0.823</b> | 0.416        | 0.394        | 0.554        | <b>0.728</b> | <b>1.000</b> | <b>0.847</b> | <b>0.769</b> | 0.662        | 0.246        | 0.025        | 0.035        | 0.026        | 0.032        |
| Stage7                  | <b>0.734</b> | 0.060        | 0.021        | 0.146        | 0.335        | <b>0.847</b> | <b>1.000</b> | <b>0.985</b> | <b>0.881</b> | 0.284        | 0.112        | 0.027        | 0.050        | 0.038        |
| Stage8                  | 0.688        | 0.020        | -0.021       | 0.088        | 0.261        | <b>0.769</b> | <b>0.985</b> | <b>1.000</b> | <b>0.919</b> | 0.307        | 0.137        | 0.040        | 0.068        | 0.049        |
| Stage9                  | 0.577        | 0.064        | 0.034        | 0.114        | 0.251        | 0.662        | <b>0.881</b> | <b>0.919</b> | <b>1.000</b> | 0.533        | 0.359        | 0.242        | 0.248        | 0.182        |
| Stage10                 | 0.167        | 0.104        | 0.100        | 0.129        | 0.169        | 0.246        | 0.284        | 0.307        | 0.533        | <b>1.000</b> | 0.685        | 0.668        | 0.623        | 0.496        |
| Stage11                 | -0.035       | -0.086       | -0.073       | -0.084       | -0.064       | 0.025        | 0.112        | 0.137        | 0.359        | 0.685        | <b>1.000</b> | <b>0.726</b> | <b>0.733</b> | 0.603        |
| Stage12                 | -0.005       | 0.040        | 0.035        | 0.047        | 0.052        | 0.035        | 0.027        | 0.040        | 0.242        | 0.668        | <b>0.726</b> | <b>1.000</b> | <b>0.788</b> | 0.696        |
| Stage13                 | 0.021        | -0.022       | -0.037       | -0.017       | -0.003       | 0.026        | 0.050        | 0.068        | 0.248        | 0.623        | <b>0.733</b> | <b>0.788</b> | <b>1.000</b> | <b>0.729</b> |
| Stage14                 | -0.008       | 0.002        | -0.001       | 0.014        | 0.022        | 0.032        | 0.038        | 0.049        | 0.182        | 0.496        | 0.603        | 0.696        | <b>0.729</b> | <b>1.000</b> |
| Indoor quiet 14/03/2018 |              |              |              |              |              |              |              |              |              |              |              |              |              |              |
|                         | Stage1       | Stage2       | Stage3       | Stage4       | Stage5       | Stage6       | Stage7       | Stage8       | Stage9       | Stage10      | Stage11      | Stage12      | Stage13      | Stage14      |
| Stage1                  | <b>1.000</b> | <b>0.932</b> | <b>0.828</b> | <b>0.830</b> | <b>0.873</b> | 0.440        | -0.373       | -0.372       | -0.409       | -0.284       | -0.260       | -0.232       | -0.257       | -0.143       |
| Stage2                  | <b>0.932</b> | <b>1.000</b> | <b>0.966</b> | <b>0.960</b> | <b>0.950</b> | 0.363        | -0.461       | -0.419       | -0.405       | -0.289       | -0.285       | -0.240       | -0.247       | -0.116       |
| Stage3                  | <b>0.828</b> | <b>0.966</b> | <b>1.000</b> | <b>0.995</b> | <b>0.948</b> | 0.325        | -0.456       | -0.407       | -0.369       | -0.273       | -0.285       | -0.238       | -0.229       | -0.091       |
| Stage4                  | <b>0.830</b> | <b>0.960</b> | <b>0.995</b> | <b>1.000</b> | <b>0.968</b> | 0.370        | -0.449       | -0.423       | -0.392       | -0.283       | -0.297       | -0.241       | -0.232       | -0.089       |
| Stage5                  | <b>0.873</b> | <b>0.950</b> | <b>0.948</b> | <b>0.968</b> | <b>1.000</b> | 0.553        | -0.332       | -0.352       | -0.350       | -0.228       | -0.256       | -0.193       | -0.212       | -0.091       |
| Stage6                  | 0.440        | 0.363        | 0.325        | 0.370        | 0.553        | <b>1.000</b> | 0.538        | 0.402        | 0.313        | 0.304        | 0.206        | 0.203        | 0.071        | -0.016       |
| Stage7                  | -0.373       | -0.461       | -0.456       | -0.449       | -0.332       | 0.538        | <b>1.000</b> | <b>0.953</b> | <b>0.884</b> | 0.690        | 0.592        | 0.484        | 0.342        | 0.087        |
| Stage8                  | -0.372       | -0.419       | -0.407       | -0.423       | -0.352       | 0.402        | <b>0.953</b> | <b>1.000</b> | <b>0.964</b> | <b>0.734</b> | 0.629        | 0.503        | 0.371        | 0.096        |
| Stage9                  | -0.409       | -0.405       | -0.369       | -0.392       | -0.350       | 0.313        | <b>0.884</b> | <b>0.964</b> | <b>1.000</b> | <b>0.813</b> | <b>0.708</b> | 0.602        | 0.489        | 0.186        |
| Stage10                 | -0.284       | -0.289       | -0.273       | -0.283       | -0.228       | 0.304        | 0.690        | <b>0.734</b> | <b>0.813</b> | <b>1.000</b> | <b>0.820</b> | <b>0.794</b> | 0.692        | 0.380        |
| Stage11                 | -0.260       | -0.285       | -0.285       | -0.297       | -0.256       | 0.206        | 0.592        | 0.629        | <b>0.708</b> | <b>0.820</b> | <b>1.000</b> | <b>0.766</b> | 0.686        | 0.370        |
| Stage12                 | -0.232       | -0.240       | -0.238       | -0.241       | -0.193       | 0.203        | 0.484        | 0.503        | 0.602        | <b>0.794</b> | <b>0.766</b> | <b>1.000</b> | <b>0.718</b> | 0.442        |
| Stage13                 | -0.257       | -0.247       | -0.229       | -0.232       | -0.212       | 0.071        | 0.342        | 0.371        | 0.489        | 0.692        | 0.686        | <b>0.718</b> | <b>1.000</b> | 0.512        |
| Stage14                 | -0.143       | -0.116       | -0.091       | -0.089       | -0.091       | -0.016       | 0.087        | 0.096        | 0.186        | 0.380        | 0.370        | 0.442        | 0.512        | <b>1.000</b> |

| Indoor busy 15/03/2018  |        |         |          |          |          |          |          |          |          |          |          |          |          |          |
|-------------------------|--------|---------|----------|----------|----------|----------|----------|----------|----------|----------|----------|----------|----------|----------|
|                         | Stage1 | Stage2  | Stage3   | Stage4   | Stage5   | Stage6   | Stage7   | Stage8   | Stage9   | Stage10  | Stage11  | Stage12  | Stage13  | Stage14  |
| Stage1                  | 1.000  | 0.895   | 0.854    | 0.717    | 0.332    | -0.283   | -0.648   | -0.641   | -0.269   | 0.281    | 0.221    | 0.125    | 0.099    | 0.133    |
| Stage2                  | 0.895  | 1.000   | 0.956    | 0.824    | 0.442    | -0.217   | -0.648   | -0.581   | -0.018   | 0.501    | 0.414    | 0.343    | 0.334    | 0.371    |
| Stage3                  | 0.854  | 0.956   | 1.000    | 0.941    | 0.619    | -0.051   | -0.540   | -0.491   | 0.014    | 0.456    | 0.381    | 0.329    | 0.320    | 0.344    |
| Stage4                  | 0.717  | 0.824   | 0.941    | 1.000    | 0.839    | 0.252    | -0.297   | -0.273   | 0.104    | 0.327    | 0.251    | 0.235    | 0.236    | 0.249    |
| Stage5                  | 0.332  | 0.442   | 0.619    | 0.839    | 1.000    | 0.723    | 0.183    | 0.156    | 0.229    | -0.001   | -0.079   | -0.027   | 0.003    | 0.015    |
| Stage6                  | -0.283 | -0.217  | -0.051   | 0.252    | 0.723    | 1.000    | 0.782    | 0.714    | 0.384    | -0.323   | -0.374   | -0.271   | -0.227   | -0.238   |
| Stage7                  | -0.648 | -0.648  | -0.540   | -0.297   | 0.183    | 0.782    | 1.000    | 0.961    | 0.497    | -0.282   | -0.286   | -0.195   | -0.179   | -0.239   |
| Stage8                  | -0.641 | -0.581  | -0.491   | -0.273   | 0.156    | 0.714    | 0.961    | 1.000    | 0.693    | -0.067   | -0.085   | 0.007    | 0.023    | -0.046   |
| Stage9                  | -0.269 | -0.018  | 0.014    | 0.104    | 0.229    | 0.384    | 0.497    | 0.693    | 1.000    | 0.611    | 0.544    | 0.603    | 0.616    | 0.552    |
| Stage10                 | 0.281  | 0.501   | 0.456    | 0.327    | -0.001   | -0.323   | -0.282   | -0.067   | 0.611    | 1.000    | 0.967    | 0.942    | 0.919    | 0.871    |
| Stage11                 | 0.221  | 0.414   | 0.381    | 0.251    | -0.079   | -0.374   | -0.286   | -0.085   | 0.544    | 0.967    | 1.000    | 0.971    | 0.947    | 0.893    |
| Stage12                 | 0.125  | 0.343   | 0.329    | 0.235    | -0.027   | -0.271   | -0.195   | 0.007    | 0.603    | 0.942    | 0.971    | 1.000    | 0.971    | 0.919    |
| Stage13                 | 0.099  | 0.334   | 0.320    | 0.236    | 0.003    | -0.227   | -0.179   | 0.023    | 0.616    | 0.919    | 0.947    | 0.971    | 1.000    | 0.936    |
| Stage14                 | 0.133  | 0.371   | 0.344    | 0.249    | 0.015    | -0.238   | -0.239   | -0.046   | 0.552    | 0.871    | 0.893    | 0.919    | 0.936    | 1.000    |
| Indoor busy 16/03/2018  |        |         |          |          |          |          |          |          |          |          |          |          |          |          |
|                         | Stage1 | Stage2  | Stage3   | Stage4   | Stage5   | Stage6   | Stage7   | Stage8   | Stage9   | Stage10  | Stage11  | Stage12  | Stage13  | Stage14  |
| Stage1                  | 1.000  | 0.973   | 0.947    | 0.934    | 0.931    | 0.886    | 0.744    | 0.563    | 0.582    | -0.429   | -0.258   | -0.279   | -0.224   | -0.052   |
| Stage2                  | 0.973  | 1.000   | 0.994    | 0.980    | 0.972    | 0.949    | 0.714    | 0.472    | 0.522    | -0.396   | -0.233   | -0.247   | -0.192   | -0.021   |
| Stage3                  | 0.947  | 0.994   | 1.000    | 0.992    | 0.982    | 0.968    | 0.680    | 0.418    | 0.483    | -0.364   | -0.198   | -0.205   | -0.152   | 0.010    |
| Stage4                  | 0.934  | 0.980   | 0.992    | 1.000    | 0.996    | 0.978    | 0.658    | 0.411    | 0.485    | -0.326   | -0.133   | -0.133   | -0.080   | 0.066    |
| Stage5                  | 0.931  | 0.972   | 0.982    | 0.996    | 1.000    | 0.982    | 0.655    | 0.432    | 0.518    | -0.310   | -0.102   | -0.101   | -0.045   | 0.098    |
| Stage6                  | 0.886  | 0.949   | 0.968    | 0.978    | 0.982    | 1.000    | 0.568    | 0.295    | 0.420    | -0.263   | -0.061   | -0.057   | -0.009   | 0.127    |
| Stage7                  | 0.744  | 0.714   | 0.680    | 0.658    | 0.655    | 0.568    | 1.000    | 0.815    | 0.681    | -0.522   | -0.454   | -0.462   | -0.374   | -0.159   |
| Stage8                  | 0.563  | 0.472   | 0.418    | 0.411    | 0.432    | 0.295    | 0.815    | 1.000    | 0.898    | -0.386   | -0.389   | -0.434   | -0.365   | -0.192   |
| Stage9                  | 0.582  | 0.522   | 0.483    | 0.485    | 0.518    | 0.420    | 0.681    | 0.898    | 1.000    | -0.201   | -0.226   | -0.290   | -0.226   | -0.031   |
| Stage10                 | -0.429 | -0.396  | -0.364   | -0.326   | -0.310   | -0.263   | -0.522   | -0.386   | -0.201   | 1.000    | 0.831    | 0.777    | 0.719    | 0.566    |
| Stage11                 | -0.258 | -0.233  | -0.198   | -0.133   | -0.102   | -0.061   | -0.454   | -0.389   | -0.226   | 0.831    | 1.000    | 0.950    | 0.916    | 0.732    |
| Stage12                 | -0.279 | -0.247  | -0.205   | -0.133   | -0.101   | -0.057   | -0.462   | -0.434   | -0.290   | 0.777    | 0.950    | 1.000    | 0.947    | 0.766    |
| Stage13                 | -0.224 | -0.192  | -0.152   | -0.080   | -0.045   | -0.009   | -0.374   | -0.365   | -0.226   | 0.719    | 0.916    | 0.947    | 1.000    | 0.830    |
| Stage14                 | -0.052 | -0.021  | 0.010    | 0.066    | 0.098    | 0.127    | -0.159   | -0.192   | -0.031   | 0.566    | 0.732    | 0.766    | 0.830    | 1.000    |
| Indoor quiet 19/03/2018 |        |         |          |          |          |          |          |          |          |          |          |          |          |          |
|                         | Stage1 | Stage2  | Stage3   | Stage4   | Stage5   | Stage6   | Stage7   | Stage8   | Stage9   | Stage10  | Stage11  | Stage12  | Stage13  | Stage14  |
| Stage1                  | 1      | 0.88568 | 0.680956 | 0.550691 | 0.566833 | 0.578944 | 0.571388 | 0.485553 | 0.196027 | 0.094929 | 0.141655 | 0.228214 | 0.265148 | 0.240162 |
| Stage2                  | 0.886  | 1.000   | 0.894    | 0.806    | 0.806    | 0.797    | 0.715    | 0.598    | 0.402    | 0.252    | 0.216    | 0.276    | 0.279    | 0.229    |
| Stage3                  | 0.681  | 0.894   | 1.000    | 0.956    | 0.970    | 0.956    | 0.881    | 0.804    | 0.611    | 0.421    | 0.340    | 0.377    | 0.353    | 0.268    |
| Stage4                  | 0.551  | 0.806   | 0.956    | 1.000    | 0.990    | 0.976    | 0.882    | 0.756    | 0.544    | 0.287    | 0.157    | 0.180    | 0.158    | 0.104    |
| Stage5                  | 0.567  | 0.806   | 0.970    | 0.990    | 1.000    | 0.993    | 0.921    | 0.816    | 0.589    | 0.351    | 0.244    | 0.273    | 0.251    | 0.183    |
| Stage6                  | 0.579  | 0.797   | 0.956    | 0.976    | 0.993    | 1.000    | 0.952    | 0.842    | 0.592    | 0.351    | 0.252    | 0.285    | 0.270    | 0.203    |
| Stage7                  | 0.571  | 0.715   | 0.881    | 0.882    | 0.921    | 0.952    | 1.000    | 0.931    | 0.640    | 0.417    | 0.343    | 0.378    | 0.370    | 0.299    |
| Stage8                  | 0.486  | 0.598   | 0.804    | 0.756    | 0.816    | 0.842    | 0.931    | 1.000    | 0.760    | 0.606    | 0.548    | 0.568    | 0.548    | 0.453    |
| Stage9                  | 0.196  | 0.402   | 0.611    | 0.544    | 0.589    | 0.592    | 0.640    | 0.760    | 1.000    | 0.832    | 0.753    | 0.719    | 0.674    | 0.564    |
| Stage10                 | 0.095  | 0.252   | 0.421    | 0.287    | 0.351    | 0.351    | 0.417    | 0.606    | 0.832    | 1.000    | 0.892    | 0.870    | 0.815    | 0.677    |
| Stage11                 | 0.142  | 0.216   | 0.340    | 0.157    | 0.244    | 0.252    | 0.343    | 0.548    | 0.753    | 0.892    | 1.000    | 0.933    | 0.899    | 0.751    |
| Stage12                 | 0.228  | 0.276   | 0.377    | 0.180    | 0.273    | 0.285    | 0.378    | 0.568    | 0.719    | 0.870    | 0.933    | 1.000    | 0.914    | 0.777    |
| Stage13                 | 0.265  | 0.279   | 0.353    | 0.158    | 0.251    | 0.270    | 0.370    | 0.548    | 0.674    | 0.815    | 0.899    | 0.914    | 1.000    | 0.786    |
| Stage14                 | 0.240  | 0.229   | 0.268    | 0.104    | 0.183    | 0.203    | 0.299    | 0.453    | 0.564    | 0.677    | 0.751    | 0.777    | 0.786    | 1.000    |

| Indoor busy 20/03/2018 |        |        |        |        |        |        |        |        |        |         |         |         |         |         |
|------------------------|--------|--------|--------|--------|--------|--------|--------|--------|--------|---------|---------|---------|---------|---------|
|                        | Stage1 | Stage2 | Stage3 | Stage4 | Stage5 | Stage6 | Stage7 | Stage8 | Stage9 | Stage10 | Stage11 | Stage12 | Stage13 | Stage14 |
| Stage1                 | 1.000  | 0.965  | 0.829  | 0.619  | 0.514  | 0.354  | -0.080 | -0.272 | 0.065  | -0.114  | -0.075  | -0.042  | -0.077  | -0.032  |
| Stage2                 | 0.965  | 1.000  | 0.788  | 0.536  | 0.420  | 0.280  | 0.011  | -0.166 | 0.151  | 0.003   | 0.037   | 0.070   | 0.023   | 0.032   |
| Stage3                 | 0.829  | 0.788  | 1.000  | 0.936  | 0.853  | 0.678  | -0.034 | -0.307 | 0.224  | -0.189  | -0.182  | -0.160  | -0.164  | -0.076  |
| Stage4                 | 0.619  | 0.536  | 0.936  | 1.000  | 0.969  | 0.822  | -0.052 | -0.343 | 0.221  | -0.305  | -0.322  | -0.310  | -0.288  | -0.158  |
| Stage5                 | 0.514  | 0.420  | 0.853  | 0.969  | 1.000  | 0.928  | 0.022  | -0.307 | 0.251  | -0.385  | -0.436  | -0.425  | -0.395  | -0.239  |
| Stage6                 | 0.354  | 0.280  | 0.678  | 0.822  | 0.928  | 1.000  | 0.287  | -0.072 | 0.405  | -0.409  | -0.517  | -0.512  | -0.479  | -0.309  |
| Stage7                 | -0.080 | 0.011  | -0.034 | -0.052 | 0.022  | 0.287  | 1.000  | 0.907  | 0.809  | 0.131   | -0.026  | -0.040  | -0.041  | -0.023  |
| Stage8                 | -0.272 | -0.166 | -0.307 | -0.343 | -0.307 | -0.072 | 0.907  | 1.000  | 0.692  | 0.203   | 0.077   | 0.058   | 0.065   | 0.057   |
| Stage9                 | 0.065  | 0.151  | 0.224  | 0.221  | 0.251  | 0.405  | 0.809  | 0.692  | 1.000  | 0.375   | 0.191   | 0.181   | 0.211   | 0.256   |
| Stage10                | -0.114 | 0.003  | -0.189 | -0.305 | -0.385 | -0.409 | 0.131  | 0.203  | 0.375  | 1.000   | 0.951   | 0.945   | 0.925   | 0.746   |
| Stage11                | -0.075 | 0.037  | -0.182 | -0.322 | -0.436 | -0.517 | -0.026 | 0.077  | 0.191  | 0.951   | 1.000   | 0.982   | 0.948   | 0.737   |
| Stage12                | -0.042 | 0.070  | -0.160 | -0.310 | -0.425 | -0.512 | -0.040 | 0.058  | 0.181  | 0.945   | 0.982   | 1.000   | 0.955   | 0.763   |
| Stage13                | -0.077 | 0.023  | -0.164 | -0.288 | -0.395 | -0.479 | -0.041 | 0.065  | 0.211  | 0.925   | 0.948   | 0.955   | 1.000   | 0.842   |
| Stage14                | -0.032 | 0.032  | -0.076 | -0.158 | -0.239 | -0.309 | -0.023 | 0.057  | 0.256  | 0.746   | 0.737   | 0.763   | 0.842   | 1.000   |
| Indoor busy 21/03/2018 |        |        |        |        |        |        |        |        |        |         |         |         |         |         |
|                        | Stage1 | Stage2 | Stage3 | Stage4 | Stage5 | Stage6 | Stage7 | Stage8 | Stage9 | Stage10 | Stage11 | Stage12 | Stage13 | Stage14 |
| Stage1                 | 1.000  | 0.977  | 0.945  | 0.907  | 0.869  | 0.792  | 0.213  | 0.513  | 0.842  | 0.790   | 0.628   | 0.621   | 0.369   | 0.213   |
| Stage2                 | 0.977  | 1.000  | 0.988  | 0.963  | 0.935  | 0.865  | 0.248  | 0.504  | 0.881  | 0.840   | 0.646   | 0.608   | 0.341   | 0.196   |
| Stage3                 | 0.945  | 0.988  | 1.000  | 0.993  | 0.976  | 0.917  | 0.270  | 0.492  | 0.897  | 0.865   | 0.645   | 0.584   | 0.311   | 0.178   |
| Stage4                 | 0.907  | 0.963  | 0.993  | 1.000  | 0.994  | 0.946  | 0.294  | 0.493  | 0.904  | 0.875   | 0.636   | 0.560   | 0.287   | 0.163   |
| Stage5                 | 0.869  | 0.935  | 0.976  | 0.994  | 1.000  | 0.972  | 0.352  | 0.519  | 0.911  | 0.880   | 0.623   | 0.535   | 0.262   | 0.146   |
| Stage6                 | 0.792  | 0.865  | 0.917  | 0.946  | 0.972  | 1.000  | 0.548  | 0.637  | 0.924  | 0.877   | 0.591   | 0.490   | 0.225   | 0.119   |
| Stage7                 | 0.213  | 0.248  | 0.270  | 0.294  | 0.352  | 0.548  | 1.000  | 0.850  | 0.558  | 0.454   | 0.262   | 0.214   | 0.113   | 0.053   |
| Stage8                 | 0.513  | 0.504  | 0.492  | 0.493  | 0.519  | 0.637  | 0.850  | 1.000  | 0.777  | 0.644   | 0.481   | 0.487   | 0.346   | 0.212   |
| Stage9                 | 0.842  | 0.881  | 0.897  | 0.904  | 0.911  | 0.924  | 0.558  | 0.777  | 1.000  | 0.943   | 0.744   | 0.681   | 0.443   | 0.295   |
| Stage10                | 0.790  | 0.840  | 0.865  | 0.875  | 0.880  | 0.877  | 0.454  | 0.644  | 0.943  | 1.000   | 0.832   | 0.754   | 0.543   | 0.407   |
| Stage11                | 0.628  | 0.646  | 0.645  | 0.636  | 0.623  | 0.591  | 0.262  | 0.481  | 0.744  | 0.832   | 1.000   | 0.863   | 0.762   | 0.617   |
| Stage12                | 0.621  | 0.608  | 0.584  | 0.560  | 0.535  | 0.490  | 0.214  | 0.487  | 0.681  | 0.754   | 0.863   | 1.000   | 0.813   | 0.649   |
| Stage13                | 0.369  | 0.341  | 0.311  | 0.287  | 0.262  | 0.225  | 0.113  | 0.346  | 0.443  | 0.543   | 0.762   | 0.813   | 1.000   | 0.752   |
| Stage14                | 0.213  | 0.196  | 0.178  | 0.163  | 0.146  | 0.119  | 0.053  | 0.212  | 0.295  | 0.407   | 0.617   | 0.649   | 0.752   | 1.000   |
| Indoor busy 22/03/2018 |        |        |        |        |        |        |        |        |        |         |         |         |         |         |
|                        | Stage1 | Stage2 | Stage3 | Stage4 | Stage5 | Stage6 | Stage7 | Stage8 | Stage9 | Stage10 | Stage11 | Stage12 | Stage13 | Stage14 |
| Stage1                 | 1.000  | 0.965  | 0.912  | 0.892  | 0.874  | 0.857  | 0.764  | 0.777  | 0.917  | 0.805   | 0.408   | 0.038   | -0.017  | 0.027   |
| Stage2                 | 0.965  | 1.000  | 0.983  | 0.968  | 0.956  | 0.934  | 0.754  | 0.749  | 0.957  | 0.860   | 0.385   | -0.034  | -0.095  | -0.043  |
| Stage3                 | 0.912  | 0.983  | 1.000  | 0.994  | 0.990  | 0.968  | 0.728  | 0.707  | 0.954  | 0.868   | 0.356   | -0.083  | -0.150  | -0.099  |
| Stage4                 | 0.892  | 0.968  | 0.994  | 1.000  | 0.997  | 0.982  | 0.754  | 0.727  | 0.950  | 0.844   | 0.332   | -0.096  | -0.162  | -0.113  |
| Stage5                 | 0.874  | 0.956  | 0.990  | 0.997  | 1.000  | 0.990  | 0.751  | 0.717  | 0.946  | 0.842   | 0.324   | -0.107  | -0.173  | -0.125  |
| Stage6                 | 0.857  | 0.934  | 0.968  | 0.982  | 0.990  | 1.000  | 0.813  | 0.768  | 0.944  | 0.807   | 0.293   | -0.116  | -0.176  | -0.127  |
| Stage7                 | 0.764  | 0.754  | 0.728  | 0.754  | 0.751  | 0.813  | 1.000  | 0.981  | 0.820  | 0.518   | 0.164   | -0.059  | -0.073  | -0.030  |
| Stage8                 | 0.777  | 0.749  | 0.707  | 0.727  | 0.717  | 0.768  | 0.981  | 1.000  | 0.821  | 0.512   | 0.185   | -0.025  | -0.035  | 0.008   |
| Stage9                 | 0.917  | 0.957  | 0.954  | 0.950  | 0.946  | 0.944  | 0.820  | 0.821  | 1.000  | 0.885   | 0.434   | 0.018   | -0.045  | 0.006   |
| Stage10                | 0.805  | 0.860  | 0.868  | 0.844  | 0.842  | 0.807  | 0.518  | 0.512  | 0.885  | 1.000   | 0.702   | 0.274   | 0.184   | 0.222   |
| Stage11                | 0.408  | 0.385  | 0.356  | 0.332  | 0.324  | 0.293  | 0.164  | 0.185  | 0.434  | 0.702   | 1.000   | 0.854   | 0.794   | 0.790   |
| Stage12                | 0.038  | -0.034 | -0.083 | -0.096 | -0.107 | -0.116 | -0.059 | -0.025 | 0.018  | 0.274   | 0.854   | 1.000   | 0.976   | 0.951   |
| Stage13                | -0.017 | -0.095 | -0.150 | -0.162 | -0.173 | -0.176 | -0.073 | -0.035 | -0.045 | 0.184   | 0.794   | 0.976   | 1.000   | 0.965   |
| Stage14                | 0.027  | -0.043 | -0.099 | -0.113 | -0.125 | -0.127 | -0.030 | 0.008  | 0.006  | 0.222   | 0.790   | 0.951   | 0.965   | 1.000   |

| Indoor quiet 23/03/2018 |        |        |        |        |        |        |        |        |        |         |         |         |         |         |
|-------------------------|--------|--------|--------|--------|--------|--------|--------|--------|--------|---------|---------|---------|---------|---------|
|                         | Stage1 | Stage2 | Stage3 | Stage4 | Stage5 | Stage6 | Stage7 | Stage8 | Stage9 | Stage10 | Stage11 | Stage12 | Stage13 | Stage14 |
| Stage1                  | 1.000  | 0.830  | 0.678  | 0.220  | 0.089  | 0.139  | 0.504  | 0.704  | 0.520  | -0.024  | -0.267  | -0.439  | -0.444  | -0.248  |
| Stage2                  | 0.830  | 1.000  | 0.798  | 0.289  | 0.103  | 0.097  | 0.516  | 0.778  | 0.693  | 0.201   | -0.060  | -0.261  | -0.338  | -0.177  |
| Stage3                  | 0.678  | 0.798  | 1.000  | 0.775  | 0.636  | 0.608  | 0.833  | 0.885  | 0.703  | 0.118   | -0.111  | -0.209  | -0.251  | -0.104  |
| Stage4                  | 0.220  | 0.289  | 0.775  | 1.000  | 0.960  | 0.912  | 0.836  | 0.633  | 0.441  | 0.021   | -0.079  | -0.028  | -0.018  | 0.036   |
| Stage5                  | 0.089  | 0.103  | 0.636  | 0.960  | 1.000  | 0.976  | 0.799  | 0.512  | 0.273  | -0.133  | -0.185  | -0.086  | -0.037  | 0.037   |
| Stage6                  | 0.139  | 0.097  | 0.608  | 0.912  | 0.976  | 1.000  | 0.843  | 0.542  | 0.235  | -0.247  | -0.316  | -0.222  | -0.148  | -0.005  |
| Stage7                  | 0.504  | 0.516  | 0.833  | 0.836  | 0.799  | 0.843  | 1.000  | 0.890  | 0.605  | -0.026  | -0.243  | -0.284  | -0.259  | -0.071  |
| Stage8                  | 0.704  | 0.778  | 0.885  | 0.633  | 0.512  | 0.542  | 0.890  | 1.000  | 0.796  | 0.156   | -0.128  | -0.262  | -0.278  | -0.098  |
| Stage9                  | 0.520  | 0.693  | 0.703  | 0.441  | 0.273  | 0.235  | 0.605  | 0.796  | 1.000  | 0.605   | 0.381   | 0.217   | 0.159   | 0.146   |
| Stage10                 | -0.024 | 0.201  | 0.118  | 0.021  | -0.133 | -0.247 | -0.026 | 0.156  | 0.605  | 1.000   | 0.858   | 0.761   | 0.654   | 0.373   |
| Stage11                 | -0.267 | -0.060 | -0.111 | -0.079 | -0.185 | -0.316 | -0.243 | -0.128 | 0.381  | 0.858   | 1.000   | 0.864   | 0.782   | 0.435   |
| Stage12                 | -0.439 | -0.261 | -0.209 | -0.028 | -0.086 | -0.222 | -0.284 | -0.262 | 0.217  | 0.761   | 0.864   | 1.000   | 0.834   | 0.488   |
| Stage13                 | -0.444 | -0.338 | -0.251 | -0.018 | -0.037 | -0.148 | -0.259 | -0.278 | 0.159  | 0.654   | 0.782   | 0.834   | 1.000   | 0.542   |
| Stage14                 | -0.248 | -0.177 | -0.104 | 0.036  | 0.037  | -0.005 | -0.071 | -0.098 | 0.146  | 0.373   | 0.435   | 0.488   | 0.542   | 1.000   |
| Outdoor 26/03/2018      |        |        |        |        |        |        |        |        |        |         |         |         |         |         |
|                         | Stage1 | Stage2 | Stage3 | Stage4 | Stage5 | Stage6 | Stage7 | Stage8 | Stage9 | Stage10 | Stage11 | Stage12 | Stage13 | Stage14 |
| Stage1                  | 1.000  | 0.674  | 0.790  | 0.859  | 0.821  | 0.615  | 0.514  | 0.378  | 0.229  | 0.010   | 0.074   | 0.082   | 0.115   | 0.118   |
| Stage2                  | 0.674  | 1.000  | 0.945  | 0.846  | 0.715  | 0.426  | 0.403  | 0.243  | 0.015  | -0.120  | 0.046   | 0.037   | 0.059   | 0.043   |
| Stage3                  | 0.790  | 0.945  | 1.000  | 0.959  | 0.841  | 0.544  | 0.481  | 0.283  | 0.036  | -0.140  | 0.059   | 0.053   | 0.084   | 0.073   |
| Stage4                  | 0.859  | 0.846  | 0.959  | 1.000  | 0.928  | 0.656  | 0.549  | 0.332  | 0.089  | -0.097  | 0.072   | 0.072   | 0.107   | 0.105   |
| Stage5                  | 0.821  | 0.715  | 0.841  | 0.928  | 1.000  | 0.882  | 0.750  | 0.555  | 0.351  | 0.117   | 0.086   | 0.094   | 0.114   | 0.127   |
| Stage6                  | 0.615  | 0.426  | 0.544  | 0.656  | 0.882  | 1.000  | 0.909  | 0.791  | 0.671  | 0.406   | 0.106   | 0.119   | 0.114   | 0.142   |
| Stage7                  | 0.514  | 0.403  | 0.481  | 0.549  | 0.750  | 0.909  | 1.000  | 0.948  | 0.821  | 0.527   | 0.143   | 0.142   | 0.129   | 0.141   |
| Stage8                  | 0.378  | 0.243  | 0.283  | 0.332  | 0.555  | 0.791  | 0.948  | 1.000  | 0.947  | 0.667   | 0.162   | 0.157   | 0.132   | 0.145   |
| Stage9                  | 0.229  | 0.015  | 0.036  | 0.089  | 0.351  | 0.671  | 0.821  | 0.947  | 1.000  | 0.796   | 0.218   | 0.219   | 0.182   | 0.201   |
| Stage10                 | 0.010  | -0.120 | -0.140 | -0.097 | 0.117  | 0.406  | 0.527  | 0.667  | 0.796  | 1.000   | 0.616   | 0.618   | 0.569   | 0.578   |
| Stage11                 | 0.074  | 0.046  | 0.059  | 0.072  | 0.086  | 0.106  | 0.143  | 0.162  | 0.218  | 0.616   | 1.000   | 0.970   | 0.942   | 0.925   |
| Stage12                 | 0.082  | 0.037  | 0.053  | 0.072  | 0.094  | 0.119  | 0.142  | 0.157  | 0.219  | 0.618   | 0.970   | 1.000   | 0.960   | 0.953   |
| Stage13                 | 0.115  | 0.059  | 0.084  | 0.107  | 0.114  | 0.114  | 0.129  | 0.132  | 0.182  | 0.569   | 0.942   | 0.960   | 1.000   | 0.968   |
| Stage14                 | 0.118  | 0.043  | 0.073  | 0.105  | 0.127  | 0.142  | 0.141  | 0.145  | 0.201  | 0.578   | 0.925   | 0.953   | 0.968   | 1.000   |
| Garage 27/03/2018       |        |        |        |        |        |        |        |        |        |         |         |         |         |         |
|                         | Stage1 | Stage2 | Stage3 | Stage4 | Stage5 | Stage6 | Stage7 | Stage8 | Stage9 | Stage10 | Stage11 | Stage12 | Stage13 | Stage14 |
| Stage1                  | 1.000  | 0.973  | 0.938  | 0.903  | 0.940  | 0.912  | 0.827  | 0.854  | 0.838  | 0.577   | 0.029   | 0.023   | 0.051   | 0.080   |
| Stage2                  | 0.973  | 1.000  | 0.966  | 0.904  | 0.908  | 0.849  | 0.757  | 0.799  | 0.790  | 0.560   | 0.046   | 0.044   | 0.064   | 0.090   |
| Stage3                  | 0.938  | 0.966  | 1.000  | 0.974  | 0.943  | 0.852  | 0.729  | 0.760  | 0.748  | 0.535   | 0.065   | 0.070   | 0.090   | 0.113   |
| Stage4                  | 0.903  | 0.904  | 0.974  | 1.000  | 0.973  | 0.883  | 0.746  | 0.747  | 0.726  | 0.505   | 0.057   | 0.063   | 0.088   | 0.114   |
| Stage5                  | 0.940  | 0.908  | 0.943  | 0.973  | 1.000  | 0.962  | 0.849  | 0.839  | 0.814  | 0.558   | 0.035   | 0.033   | 0.065   | 0.095   |
| Stage6                  | 0.912  | 0.849  | 0.852  | 0.883  | 0.962  | 1.000  | 0.953  | 0.927  | 0.897  | 0.611   | 0.013   | 0.001   | 0.042   | 0.075   |
| Stage7                  | 0.827  | 0.757  | 0.729  | 0.746  | 0.849  | 0.953  | 1.000  | 0.975  | 0.949  | 0.659   | 0.008   | -0.011  | 0.033   | 0.064   |
| Stage8                  | 0.854  | 0.799  | 0.760  | 0.747  | 0.839  | 0.927  | 0.975  | 1.000  | 0.992  | 0.708   | 0.028   | 0.011   | 0.051   | 0.080   |
| Stage9                  | 0.838  | 0.790  | 0.748  | 0.726  | 0.814  | 0.897  | 0.949  | 0.992  | 1.000  | 0.761   | 0.087   | 0.069   | 0.108   | 0.136   |
| Stage10                 | 0.577  | 0.560  | 0.535  | 0.505  | 0.558  | 0.611  | 0.659  | 0.708  | 0.761  | 1.000   | 0.672   | 0.657   | 0.679   | 0.683   |
| Stage11                 | 0.029  | 0.046  | 0.065  | 0.057  | 0.035  | 0.013  | 0.008  | 0.028  | 0.087  | 0.672   | 1.000   | 0.986   | 0.978   | 0.948   |
| Stage12                 | 0.023  | 0.044  | 0.070  | 0.063  | 0.033  | 0.001  | -0.011 | 0.011  | 0.069  | 0.657   | 0.986   | 1.000   | 0.982   | 0.954   |
| Stage13                 | 0.051  | 0.064  | 0.090  | 0.088  | 0.065  | 0.042  | 0.033  | 0.051  | 0.108  | 0.679   | 0.978   | 0.982   | 1.000   | 0.973   |
| Stage14                 | 0.080  | 0.090  | 0.113  | 0.114  | 0.095  | 0.075  | 0.064  | 0.080  | 0.136  | 0.683   | 0.948   | 0.954   | 0.973   | 1.000   |

## Figures

| MON       | TUE    | WED   | THU  | FRI   | SAT | SUN |
|-----------|--------|-------|------|-------|-----|-----|
| 12        | 13     | 14    | 15   | 16    | 17  | 18  |
| WAREHOUSE |        |       |      |       |     |     |
| QUIET     | QUIET  | QUIET | BUSY | BUSY  |     |     |
| 19        | 20     | 21    | 22   | 23    | 24  | 25  |
| WAREHOUSE |        |       |      |       |     |     |
| QUIET     | BUSY   | BUSY  | BUSY | QUIET |     |     |
| 26        | 27     | 28    | 29   | 30    | 31  | 01  |
| OUTDOOR   | GARAGE |       |      |       |     |     |

Figure S1. Calendar of sampling days during March 2018.

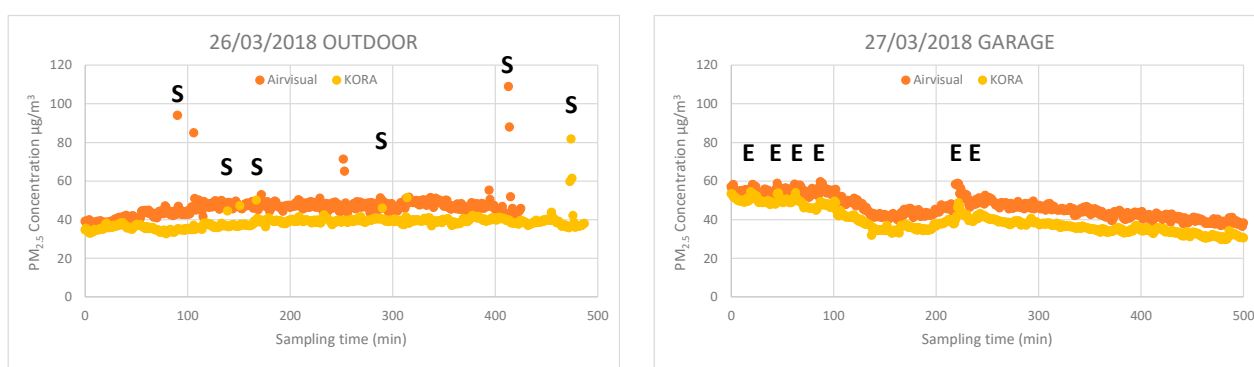Figure S2. Daily concentrations of PM<sub>2.5</sub> (averaged over 1 min sampling time) of KORA and AirVisual Pro collected outdoor (left) and in the garage (right). The starting time of different events is labelled with the corresponding letter as specified in Table S1.

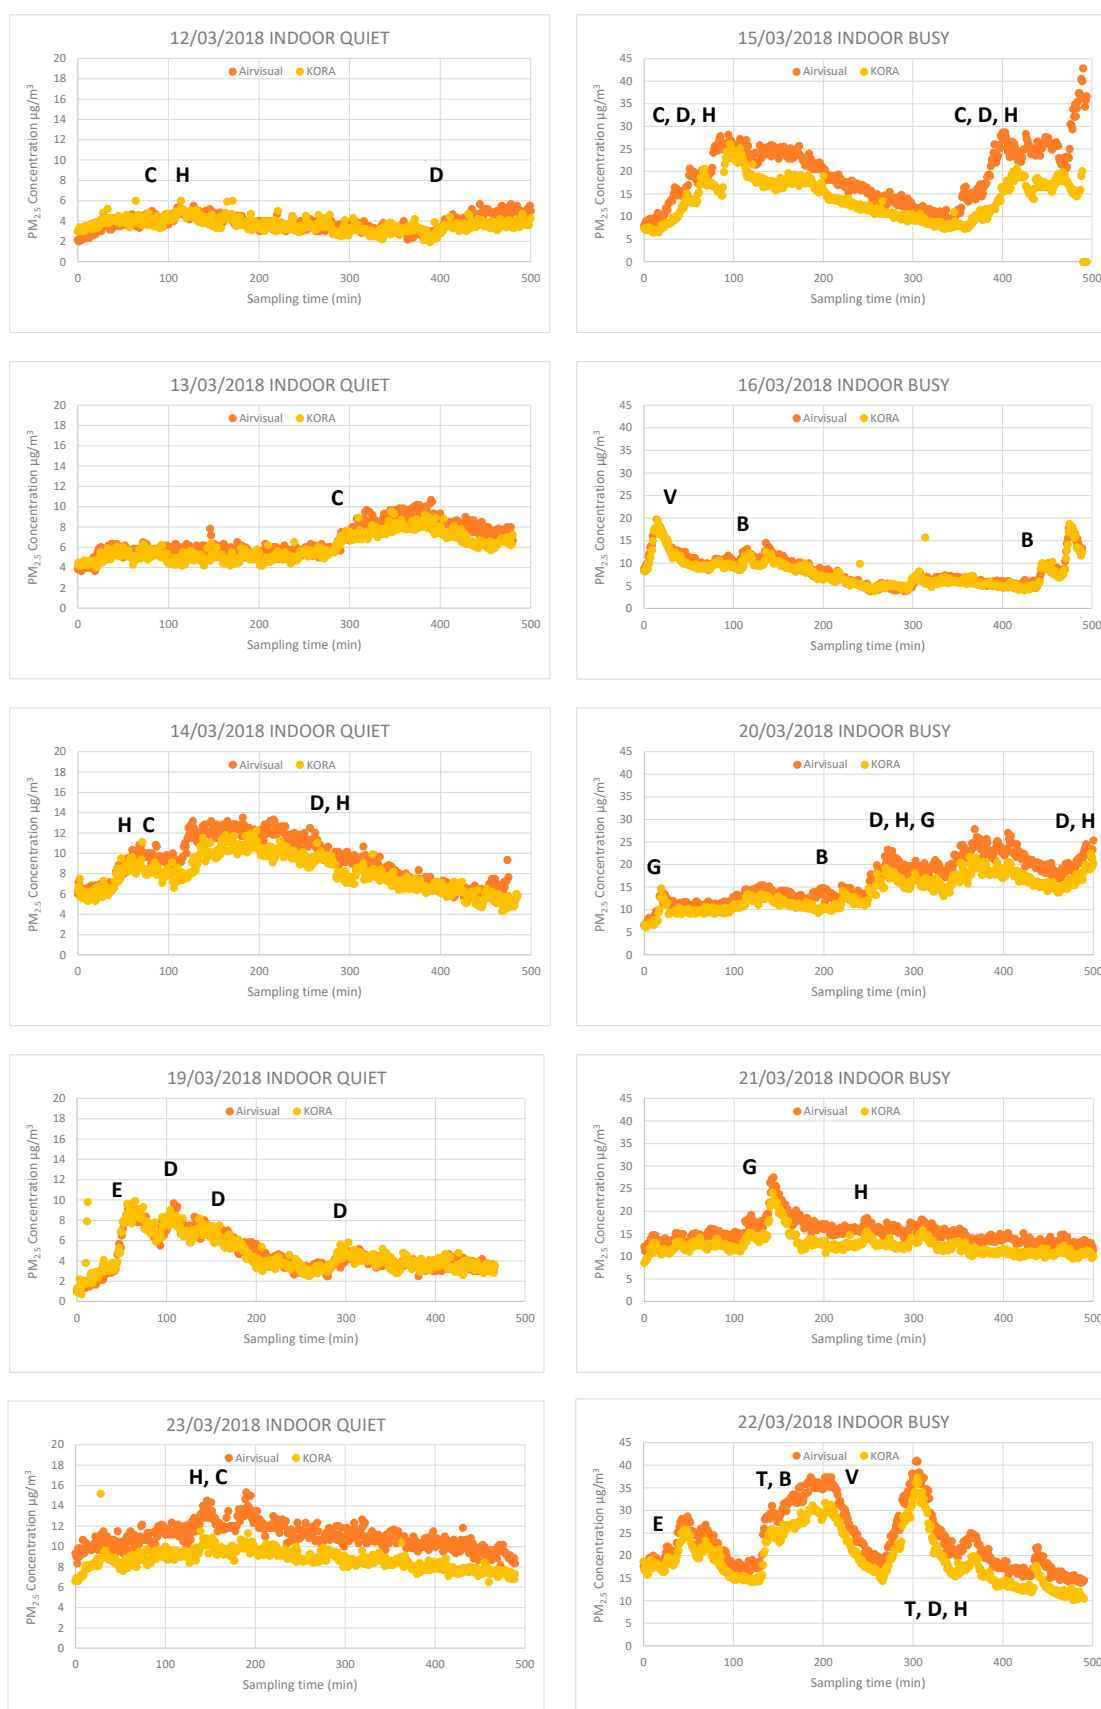

**Figure S3.** Daily concentrations of PM<sub>2.5</sub> (averaged over 1 min sampling time) of KORA and AirVisual Pro collected in the warehouse. It should be noted the different y-axis scale up to 20 µg/m³ for “indoor quiet” and up to 45 µg/m³ for “indoor busy”. The starting time of different events is labelled with the corresponding letter as specified in Table S1.



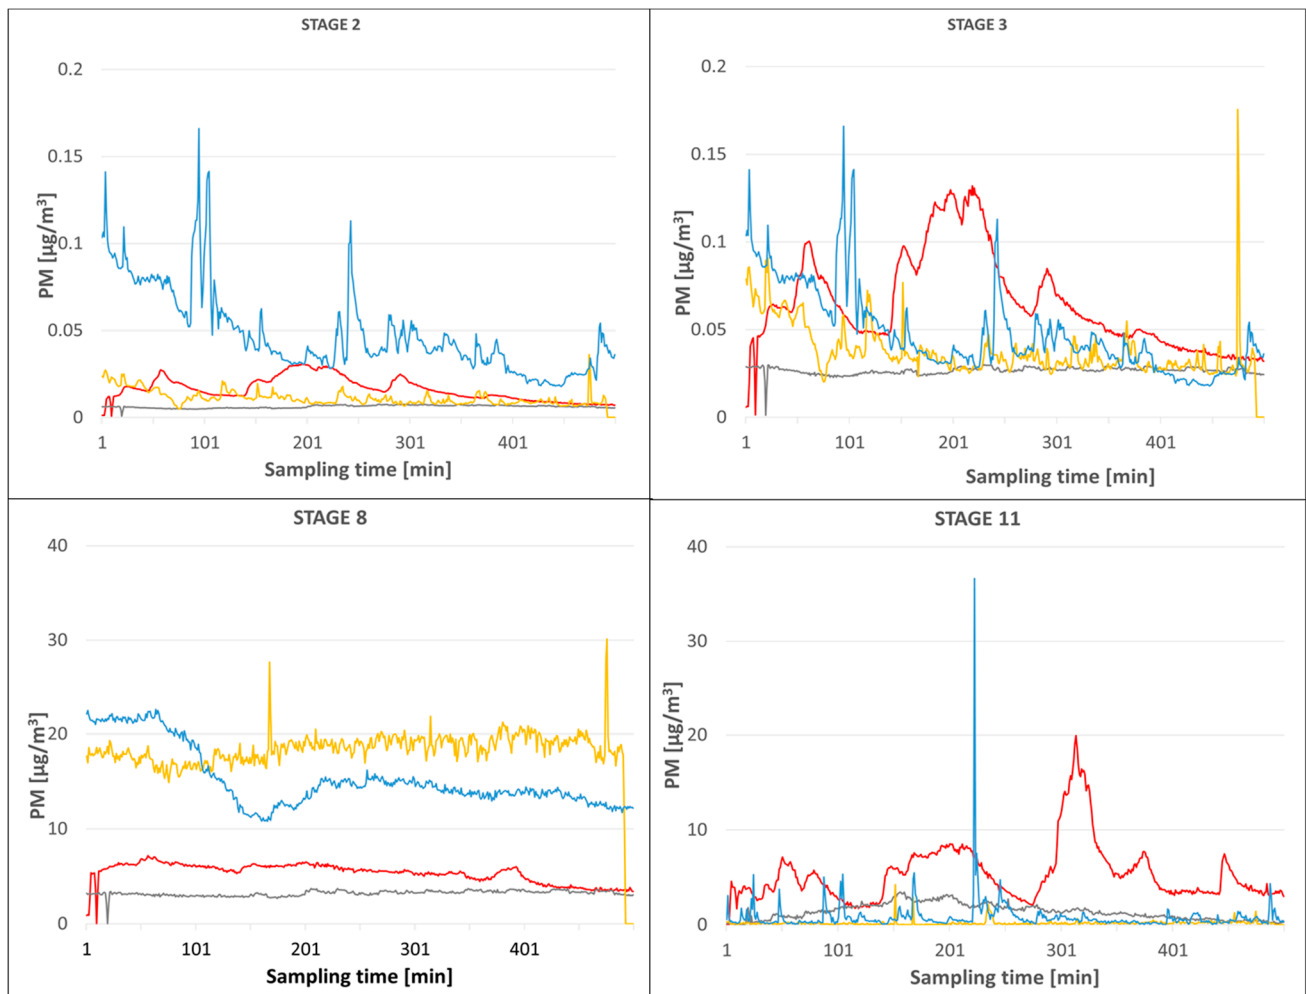

**Figure S4.** Daily PM<sub>2.5</sub> concentrations (averaged over 1 min sampling time) of ELPI+ data from Stage 2, Stage 3, Stage 8 and Stage 11.

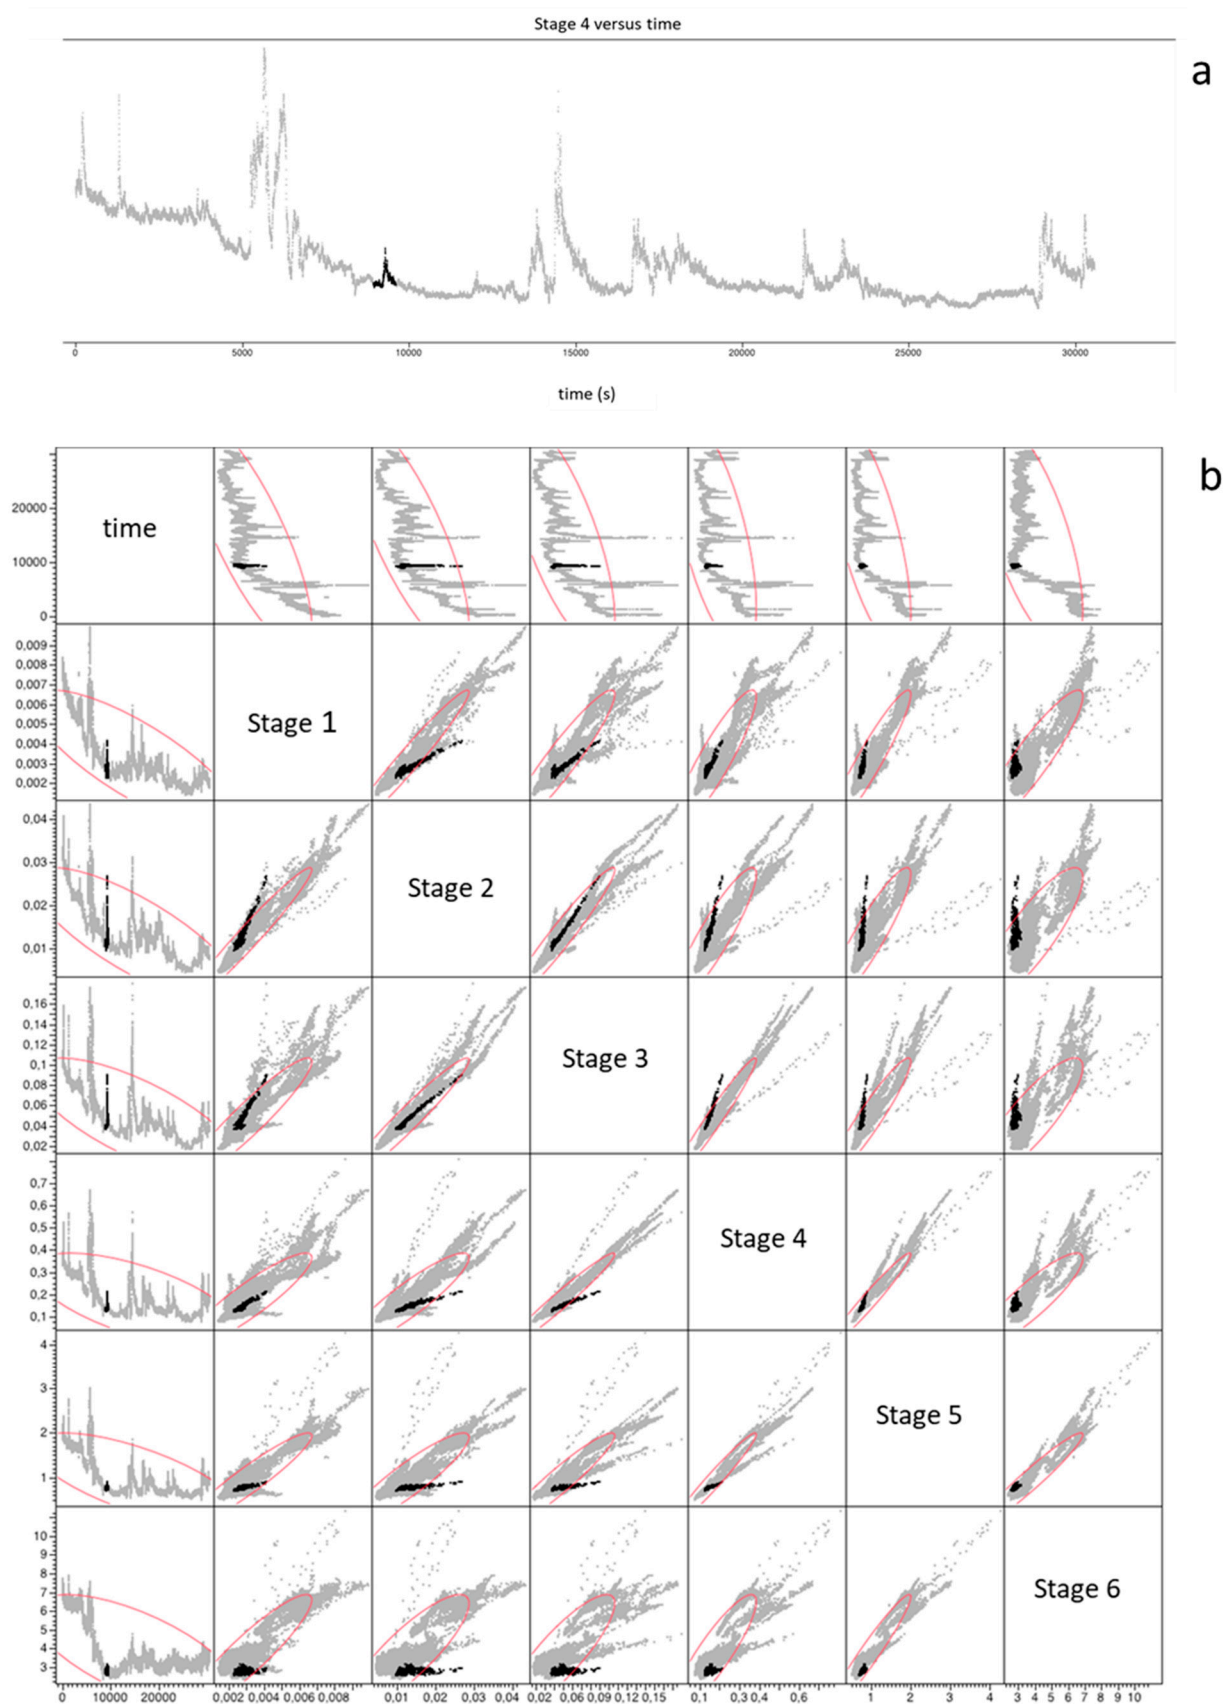

**Figure S5.** Daily concentrations pattern measured by ELPI + Stage 4 (grey) and the corresponding linear correlation plots with Stages from 1 to 6. Data highlighted in black refer to the event of truck entering the warehouse.

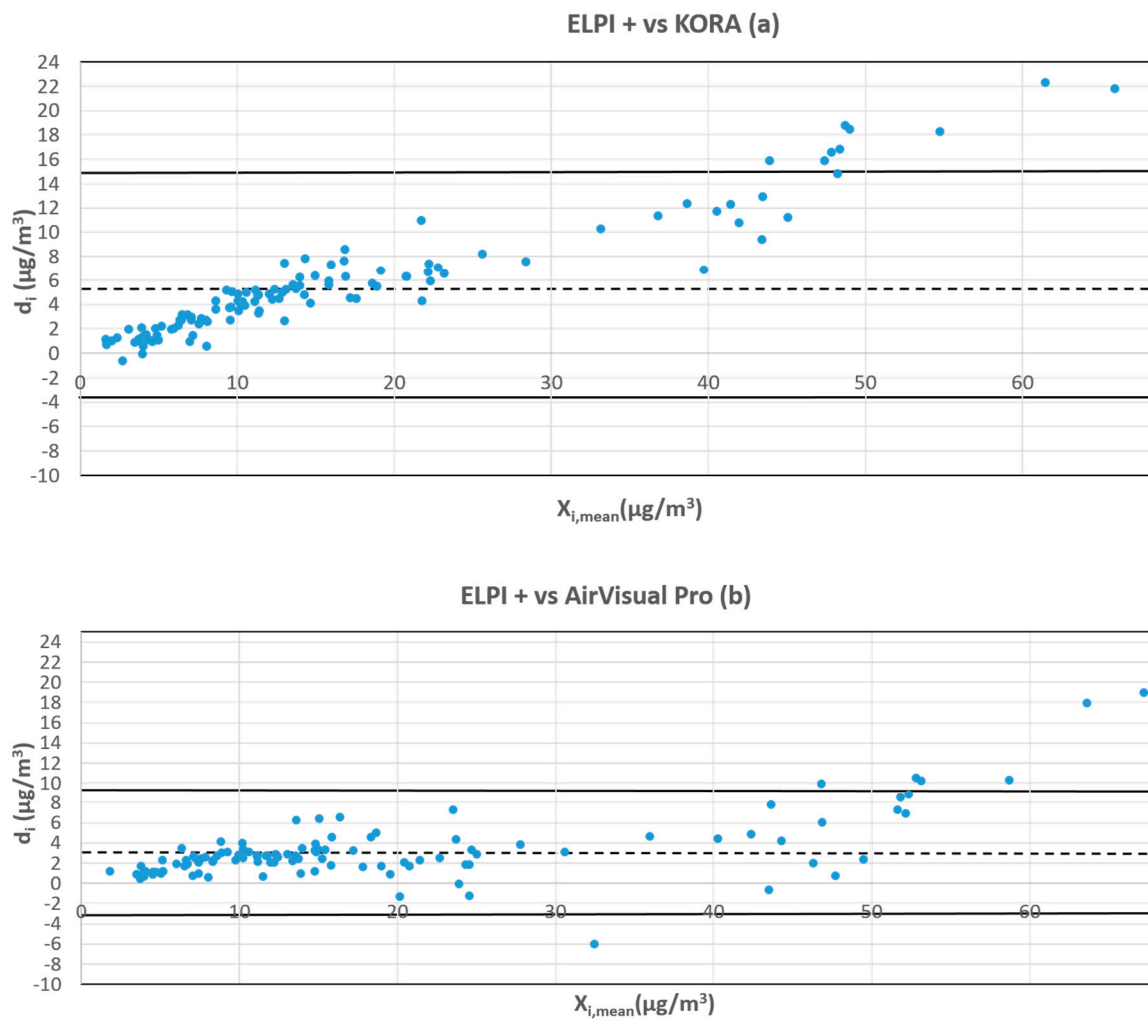

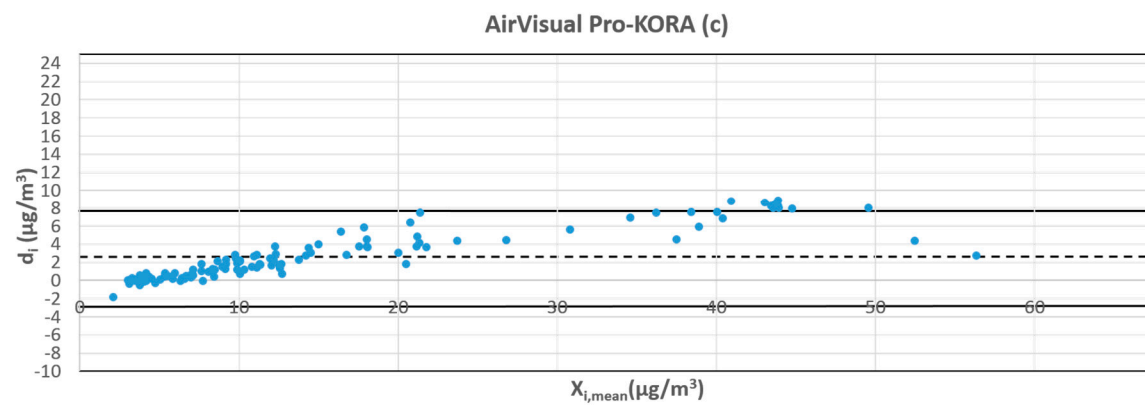

**Figure S6.** Altman Plots representing the difference of PM<sub>2.5</sub> hourly concentrations between ELPI + and KORA(a), ELPI + and AirVisual Pro (b) and AirVisual Pro and KORA (c) measurements. On the y-axis the difference for each measure  $i$  of PM<sub>2.5</sub> ( $d_i$ : ELPI + -KORA; ELPI + -AirVisual Pro; AirVisual Pro-KORA) between the 2 monitoring devices is plotted. On the x-axis the average value  $X_{i,\text{mean}}$  between the two monitoring devices considered is represented. The dashed line represents the  $d_{i,\text{mean}}$  while the two solid lines underline the 95% confidence interval ( $d_{i,\text{mean}} \pm 1.96 \text{ SD}$ ).

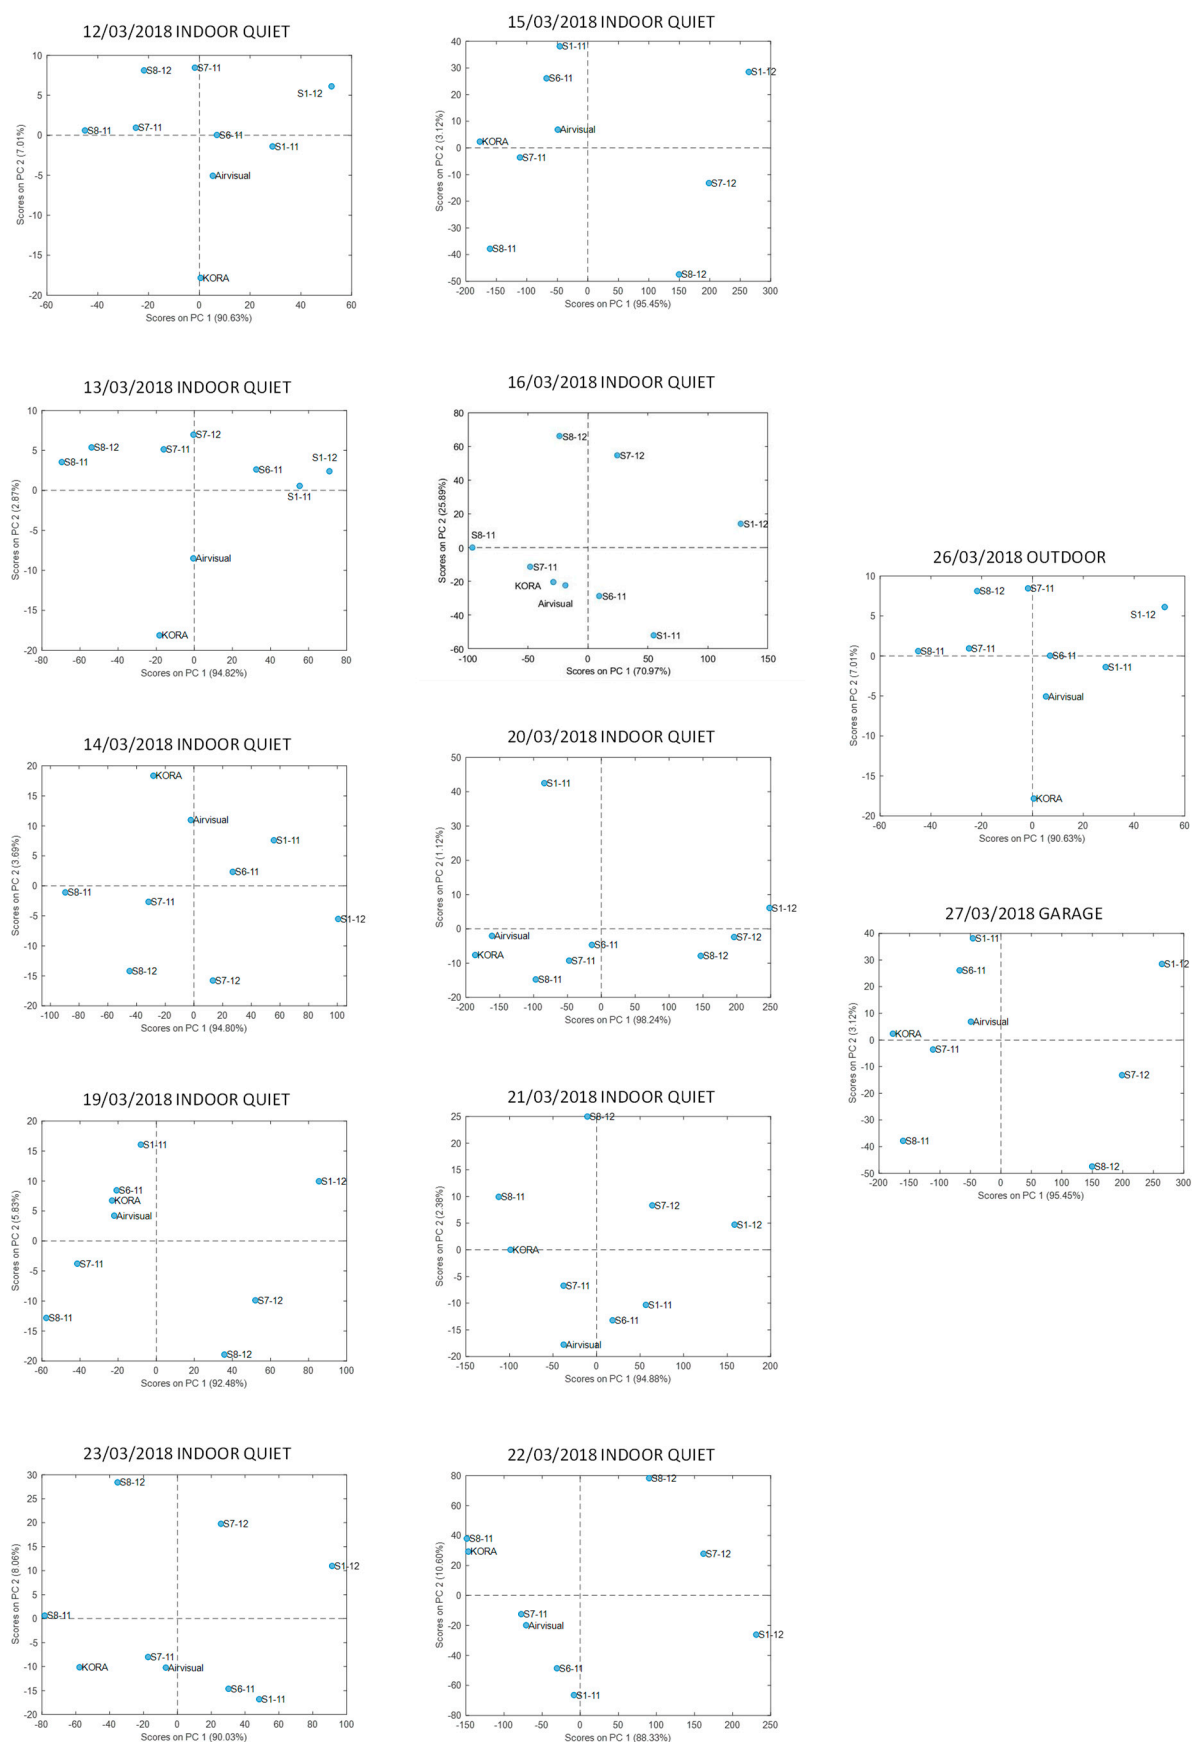

**Figure S7.** Score plots of the first two components (PC1 vs PC2) of the PCA, for each daily dataset

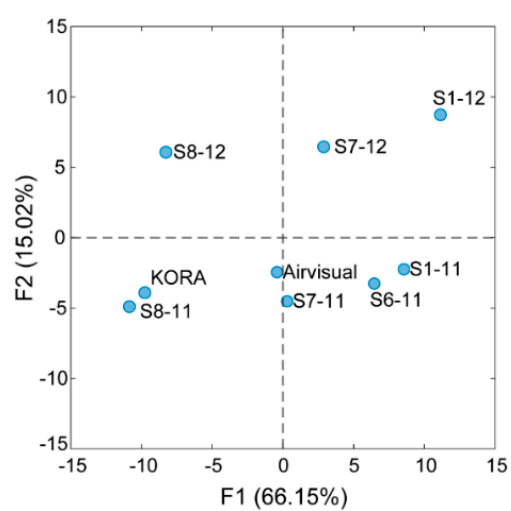

**Figure S8.** Score plot of the first two factors (F1 vs F2), for the first mode (instruments mode), of the PARAFAC statistical model.
